# Supplementary material for: Computational prediction of structural, electronic, and optical properties and phase stability of double perovskites K2SnX6 (X = I, Br, Cl)
Source: Royal Society of Chemistry journal article supplement (doi:10.1039/c9ra09232c), 2019-12-24
Supplement: c9ra09232c1.pdf [file c9ra09232c1.pdf]

# Supporting Information – Computational Prediction of Structural, Electronic, Optical Properties and Phase Stability of Double Perovskites $K_2SnX_6$ ( $X = I, Br, Cl$ )

Un-Gi Jong<sup>a,b\*</sup>, Chol-Jun Yu<sup>a†</sup>, Yun-Hyok Kye<sup>a,b</sup>

<sup>a</sup> Chair of Computational Materials Design, Faculty of Materials Science, Kim Il Sung University, Ryongnam-Dong, Taesong District, Pyongyang, Democratic People's Republic of Korea

<sup>b</sup> Natural Science Centre, Kim Il Sung University, Ryongnam-Dong, Taesong District, Pyongyang, Democratic People's Republic of Korea

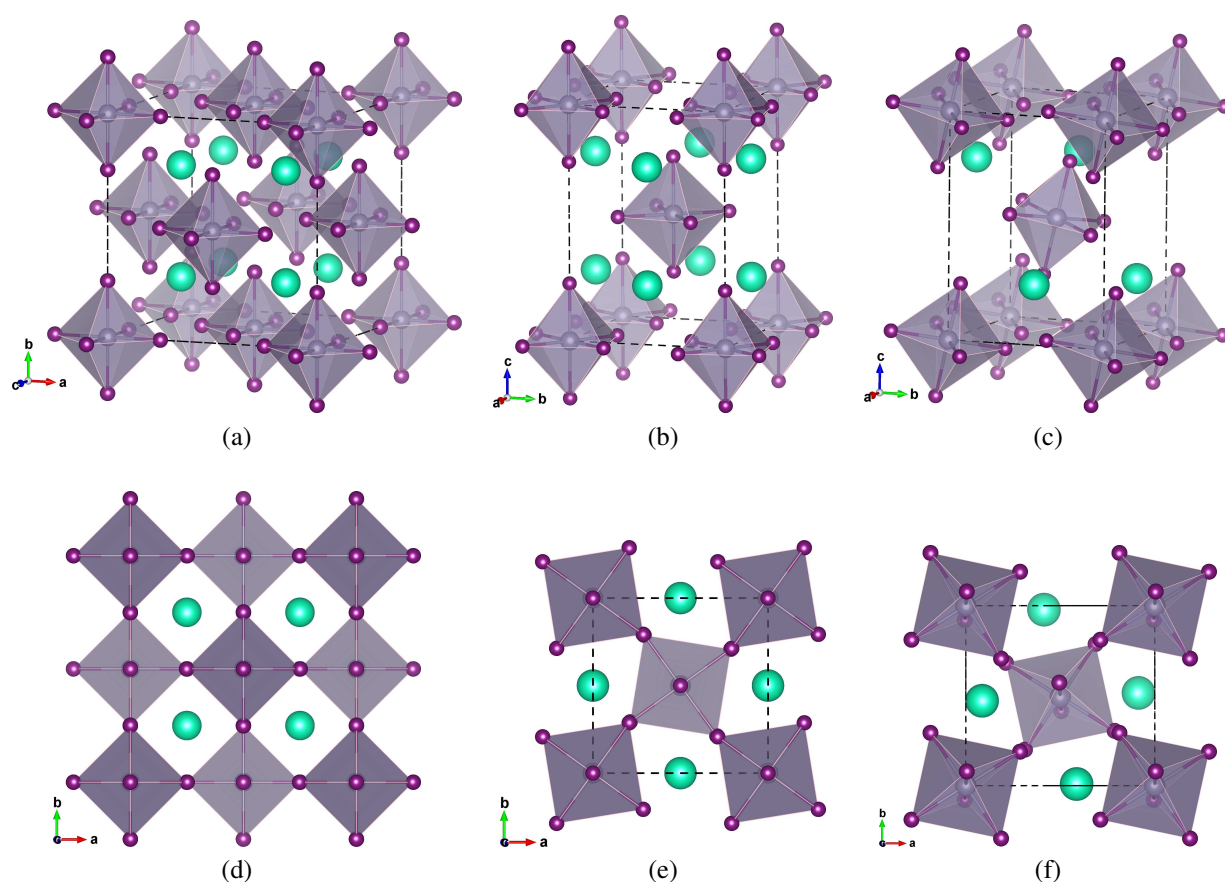

Figure S1. Polyhedral view of optimized crystal structures of (a), (d) cubic, (b), (e) tetragonal, and (c), (f) monoclinic  $K_2SnX_6$  in perspective (top panel) and  $x - y$  plane (lower panel). Grey, purple and green balls represent Sn, X and K atoms, respectively.

\*Corresponding author: Un-Gi Jong, Email: ug.jong@ryongnamsan.edu.kp

†Corresponding author: Chol-Jun Yu, Email: cj.yu@ryongnamsan.edu.kp

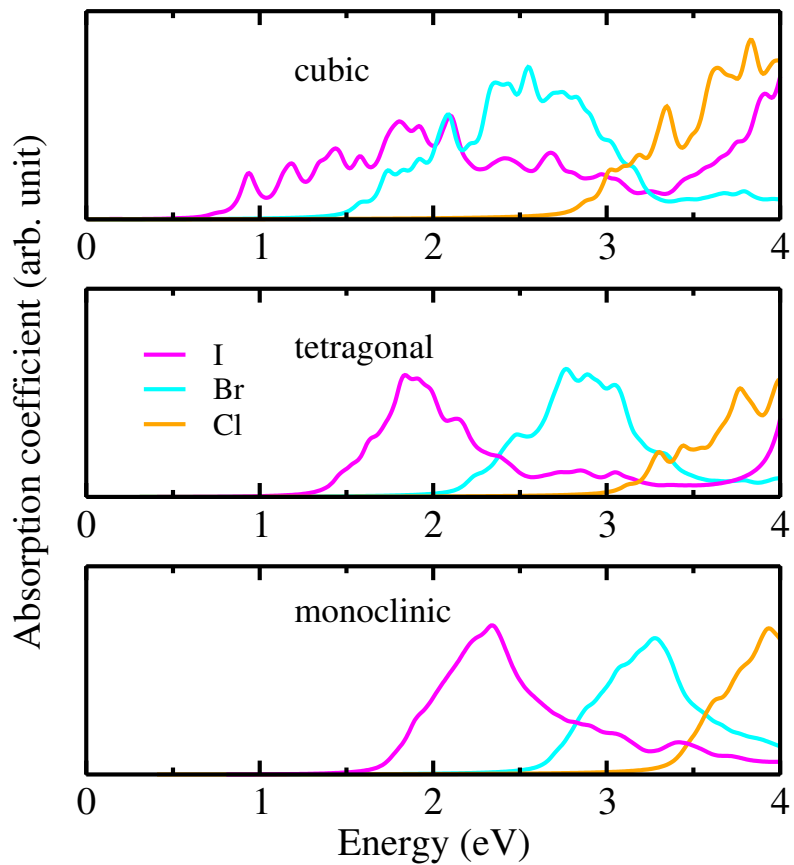

Figure S2. Light-absorption coefficients calculated within the density functional perturbation theory for the cubic, tetragonal, and monoclinic phases of  $K_2SnX_6$  ( $X = I, Br, Cl$ ).

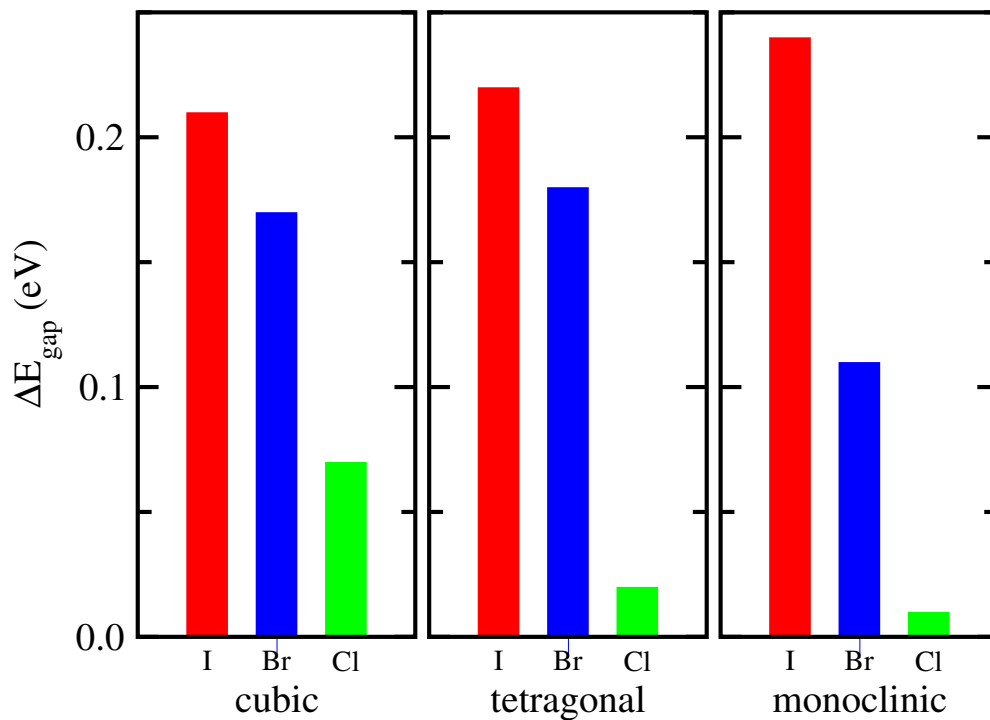

Figure S3. Band gap differences between HSE and HSE+SOC calculations for the cubic, tetragonal, and monoclinic phases of  $K_2SnX_6$  ( $X = I, Br, Cl$ ).
